# Supplementary material for: High-Yield Recovery of Antioxidant Compounds from Bambusa chungii Culms Using Pressurized Hot Water Extraction
Source: Antioxidants (Basel). 2022 Nov 12;11(11):2231. doi: 10.3390/antiox11112231 (PMC9686541; doi:10.3390/antiox11112231)
Supplement: Supplementary file 1 [file antioxidants-11-02231-s001.zip]

Archive with 8 entries (8 files):
- Figure S1. Schematic of PHWE extraction.pdf
- Figure S2. Color of the Bambusa chungii culms extracts obtained by PHWE and conventional extraction methods..pdf
- Figure S3. Chemical structures of the extracted target phenolic compounds.pdf
- Table S1. Elution gradient.pdf
- Table S2. MS data and identification results of the target phenolic compounds in Bambusa chungii culms extracts by LC-Q-TOF-MS..pdf
- Table S3. Contents of the target phenolic compounds, FF, and HMF in the extracts obtained from PHWE at different extraction time..pdf
- Table S4. Contents of the target phenolic compounds, FF, and HMF in the extracts obtained from PHWE at different material-to-liquid ratio..pdf
- Table S5. Model summary and ANOVA results of the response variables.pdf
