# Supplementary material for: High-Yield Recovery of Antioxidant Compounds from Bambusa chungii Culms Using Pressurized Hot Water Extraction
Source: Antioxidants (Basel). 2022 Nov 12;11(11):2231. doi: 10.3390/antiox11112231 (PMC9686541; doi:10.3390/antiox11112231)
Supplement: Supplementary file 1 [file antioxidants-11-02231-s001.zip › Table S1. Elution gradient.pdf]

**Table S1.** Elution gradient

| Time<br>(min) | Mobile phase composition |       |
|---------------|--------------------------|-------|
|               | A (%)                    | B (%) |
| 0             | 95                       | 5     |
| 5             | 95                       | 5     |
| 7             | 92                       | 8     |
| 20            | 90                       | 10    |
| 35            | 75                       | 25    |
| 45            | 60                       | 40    |
| 50            | 10                       | 90    |
| 55            | 10                       | 90    |
