# Supplementary material for: High-Yield Recovery of Antioxidant Compounds from Bambusa chungii Culms Using Pressurized Hot Water Extraction
Source: Antioxidants (Basel). 2022 Nov 12;11(11):2231. doi: 10.3390/antiox11112231 (PMC9686541; doi:10.3390/antiox11112231)
Supplement: Supplementary file 1 [file antioxidants-11-02231-s001.zip › Table S2. MS data and identification results of the target phenolic compounds in Bambusa chungii culms extracts by LC-Q-TOF-MS..pdf]

**Table S2.** MS data and identification results of the target phenolic compounds in *Bambusa chungii* culms extracts by LC-Q-TOF-MS.

| No. | Retention time<br>(min) | Species                             | Measured<br>(m/z) | Calculated<br>(m/z) | Error<br>(ppm) | Main fragments | Formula                                                       | Identification                |
|-----|-------------------------|-------------------------------------|-------------------|---------------------|----------------|----------------|---------------------------------------------------------------|-------------------------------|
| 1   | 1.53                    | [M+H] <sup>+</sup>                  | 193.0702          | 193.0707            | 0.25           | 147.0650       | C <sub>7</sub> H <sub>12</sub> O <sub>6</sub>                 | Quinic acid                   |
| 2   | 2.07                    | [M+Na] <sup>+</sup>                 | 295.0783          | 295.0788            | 2.11           | 176.5382       | C <sub>12</sub> H <sub>16</sub> O <sub>7</sub>                | Arbutin                       |
| 3   | 2.08                    | [M+H] <sup>+</sup>                  | 268.1026          | 268.104             | -2.08          | 136.0636       | C <sub>10</sub> H <sub>13</sub> N <sub>5</sub> O <sub>4</sub> | Adenosine                     |
| 4   | 3.05                    | [M+Na] <sup>+</sup>                 | 325.0897          | 325.0894            | -0.65          | 171.0289       | C <sub>13</sub> H <sub>18</sub> O <sub>8</sub>                | Tachioside                    |
| 5   | 4.4                     | [M+H] <sup>+</sup>                  | 127.0388          | 127.0390            | 1.45           | 109.0279       | C <sub>6</sub> H <sub>6</sub> O <sub>3</sub>                  | 5-Hydroxymethylfurfural*      |
| 6   | 6.12                    | [M+H] <sup>+</sup>                  | 97.0284           | 97.0284             | -3.18          | -              | C <sub>5</sub> H <sub>4</sub> O <sub>2</sub>                  | Furfural *                    |
| 7   | 8.44                    | [M+H-H <sub>2</sub> O] <sup>+</sup> | 137.0593          | 137.0597            | 2.96           | -              | C <sub>8</sub> H <sub>10</sub> O <sub>3</sub>                 | Vanillic alcohol              |
| 8   | 9.73                    | [M+H] <sup>+</sup>                  | 139.0386          | 139.0390            | -2.26          | 121.0292       | C <sub>7</sub> H <sub>6</sub> O <sub>3</sub>                  | <i>p</i> -Hydroxybenzoic acid |
| 9   | 12.81                   | [M+H] <sup>+</sup>                  | 169.0492          | 169.0495            | 3.44           | -              | C <sub>8</sub> H <sub>8</sub> O <sub>4</sub>                  | Vanillic acid                 |
| 10  | 13.31                   | [M+H] <sup>+</sup>                  | 123.0437          | 123.0441            | 2.89           | 95.0482        | C <sub>7</sub> H <sub>6</sub> O <sub>2</sub>                  | <i>p</i> -Hydroxybenzaldehyde |
| 11  | 13.37                   | [M+H] <sup>+</sup>                  | 181.0491          | 181.0495            | 2.54           | 163.037        | C <sub>9</sub> H <sub>8</sub> O <sub>4</sub>                  | Caffeic acid                  |
| 12  | 15.3                    | [M+H] <sup>+</sup>                  | 199.0595          | 199.0601            | 1.21           | 155.0681       | C <sub>9</sub> H <sub>10</sub> O <sub>5</sub>                 | Syringic acid                 |
| 13  | 18.34                   | [M+H] <sup>+</sup>                  | 153.0541          | 153.0546            | 0.75           | 125.063        | C <sub>8</sub> H <sub>8</sub> O <sub>3</sub>                  | Vanillin                      |
| 14  | 20.68                   | [M+H] <sup>+</sup>                  | 165.0540          | 165.0546            | 1.14           | 147.0441       | C <sub>9</sub> H <sub>8</sub> O <sub>3</sub>                  | <i>p</i> -Coumaric acid       |
| 15  | 21.33                   | [M+H-H <sub>2</sub> O] <sup>+</sup> | 181.0858          | 181.0859            | -2.11          | 131.0493       | C <sub>10</sub> H <sub>12</sub> O <sub>3</sub>                | Coniferol                     |
| 16  | 23.1                    | [M+H] <sup>+</sup>                  | 183.0649          | 183.0652            | 0.84           | 155.0714       | C <sub>9</sub> H <sub>10</sub> O <sub>4</sub>                 | Syringaldehyde                |
| 17  | 25.96                   | [M+H] <sup>+</sup>                  | 195.0648          | 195.0652            | -0.63          | 177.0555       | C <sub>10</sub> H <sub>10</sub> O <sub>4</sub>                | Ferulic acid                  |
| 18  | 29.89                   | [M+H] <sup>+</sup>                  | 179.0699          | 179.0703            | -1.08          | 151.0377       | C <sub>10</sub> H <sub>10</sub> O <sub>3</sub>                | Coniferylaldehyde             |
| 19  | 31.13                   | [M+H] <sup>+</sup>                  | 209.0804          | 209.0808            | -1.25          | 165.0469       | C <sub>11</sub> H <sub>12</sub> O <sub>4</sub>                | Sinapaldehyde                 |
| 20  | 39.52                   | [M+H] <sup>+</sup>                  | 419.1697          | 419.1700            | 1.27           | 265.1074       | C <sub>22</sub> H <sub>26</sub> O <sub>8</sub>                | Syringaresinol                |
| 21  | 40.42                   | [M+H] <sup>+</sup>                  | 357.1328          | 357.1333            | 0.48           | 339.1206       | C <sub>20</sub> H <sub>20</sub> O <sub>6</sub>                | Balanophonin                  |

All the identified compounds were compared with standard compounds.

\*: 5-Hydroxymethylfurfural (HMF) and furfural (FF) were detected by this method.
