# Supplementary material for: High-Yield Recovery of Antioxidant Compounds from Bambusa chungii Culms Using Pressurized Hot Water Extraction
Source: Antioxidants (Basel). 2022 Nov 12;11(11):2231. doi: 10.3390/antiox11112231 (PMC9686541; doi:10.3390/antiox11112231)
Supplement: Supplementary file 1 [file antioxidants-11-02231-s001.zip › Table S3. Contents of the target phenolic compounds, FF, and HMF in the extracts obtained from PHWE at different extraction time..pdf]

**Table S3.** Contents of the target phenolic compounds, FF, and HMF in the extracts obtained from PHWE at different extraction time.

| Compounds                     | Yield ( $\mu\text{g/g RM}$ )  |                               |                               |                               |                                   |
|-------------------------------|-------------------------------|-------------------------------|-------------------------------|-------------------------------|-----------------------------------|
|                               | 5 min                         | 10 min                        | 20 min                        | 30 min                        | 40 min                            |
| Quinic acid                   | 20.5 $\pm$ 0.6 <sup>bc</sup>  | 23.0 $\pm$ 1.0 <sup>c</sup>   | 20.8 $\pm$ 0.9 <sup>b</sup>   | 18.9 $\pm$ 0.4 <sup>b</sup>   | 15.2 $\pm$ 1.6 <sup>a</sup>       |
| Adenosine                     | 34.5 $\pm$ 0.3 <sup>c</sup>   | 27.80 $\pm$ 0.22 <sup>b</sup> | 25.61 $\pm$ 0.15 <sup>b</sup> | 22.5 $\pm$ 1.3 <sup>a</sup>   | 26.4 $\pm$ 2.1 <sup>b</sup>       |
| Arbutin                       | ND                            | ND                            | ND                            | ND                            | ND                                |
| Tachioside                    | ND                            | ND                            | ND                            | ND                            | ND                                |
| Vanillic alcohol              | ND                            | ND                            | ND                            | ND                            | ND                                |
| <i>p</i> -Hydroxybenzoic acid | 23.53 $\pm$ 0.27 <sup>a</sup> | 23.64 $\pm$ 0.29 <sup>a</sup> | 27.8 $\pm$ 1.4 <sup>b</sup>   | 27.3 $\pm$ 0.4 <sup>b</sup>   | 25.7 $\pm$ 1.7 <sup>ab</sup>      |
| Vanillic acid                 | 109 $\pm$ 6 <sup>b</sup>      | 75.4 $\pm$ 0.5 <sup>b</sup>   | 59.2 $\pm$ 0.3 <sup>a</sup>   | 58.7 $\pm$ 2.4 <sup>a</sup>   | 51 $\pm$ 10 <sup>a</sup>          |
| <i>p</i> -Hydroxybenzaldehyde | 245.5 $\pm$ 1.5 <sup>a</sup>  | 254 $\pm$ 5 <sup>a</sup>      | 304 $\pm$ 5 <sup>b</sup>      | 331 $\pm$ 3 <sup>c</sup>      | 329 $\pm$ 4 <sup>c</sup>          |
| Caffeic acid                  | 10.90 $\pm$ 0.04 <sup>a</sup> | 10.6 $\pm$ 0.8 <sup>a</sup>   | 10.91 $\pm$ 0.10 <sup>a</sup> | 10.3 $\pm$ 0.4 <sup>a</sup>   | 11.5 $\pm$ 1.3 <sup>a</sup>       |
| Syringic acid                 | 39 $\pm$ 7 <sup>a</sup>       | 39.3 $\pm$ 2.3 <sup>a</sup>   | 53.8 $\pm$ 1.8 <sup>b</sup>   | 54 $\pm$ 4 <sup>b</sup>       | 53 $\pm$ 6 <sup>b</sup>           |
| Vanillin                      | 59.60 $\pm$ 0.15 <sup>a</sup> | 70 $\pm$ 7 <sup>b</sup>       | 105 $\pm$ 3 <sup>b</sup>      | 110.0 $\pm$ 1.3 <sup>c</sup>  | 112.8 $\pm$ 0.5 <sup>c</sup>      |
| <i>p</i> -Coumaric acid       | 997 $\pm$ 49 <sup>a</sup>     | 1098 $\pm$ 20 <sup>b</sup>    | 1122 $\pm$ 31 <sup>c</sup>    | 1230 $\pm$ 13 <sup>c</sup>    | 1059 $\pm$ 20 <sup>d</sup>        |
| Coniferol                     | 1112 $\pm$ 39 <sup>d</sup>    | 1060 $\pm$ 27 <sup>d</sup>    | 976 $\pm$ 8 <sup>c</sup>      | 838 $\pm$ 31 <sup>b</sup>     | 730 $\pm$ 19 <sup>a</sup>         |
| Syringaldehyde                | 49.0 $\pm$ 0.3 <sup>a</sup>   | 47.1 $\pm$ 1.0 <sup>a</sup>   | 90.5 $\pm$ 0.5 <sup>b</sup>   | 97 $\pm$ 5 <sup>bc</sup>      | 103 $\pm$ 8 <sup>c</sup>          |
| Ferulic acid                  | 30.1 $\pm$ 0.7 <sup>a</sup>   | 32.7 $\pm$ 0.5 <sup>a</sup>   | 44.2 $\pm$ 0.5 <sup>b</sup>   | 49.30 $\pm$ 0.09 <sup>c</sup> | 46.7 $\pm$ 2.7 <sup>bc</sup>      |
| Coniferylaldehyde             | 51 $\pm$ 3 <sup>a</sup>       | 49.11 $\pm$ 0.10 <sup>a</sup> | 72.6 $\pm$ 0.4 <sup>b</sup>   | 68 $\pm$ 6 <sup>b</sup>       | 67.4 $\pm$ 0.8 <sup>b</sup>       |
| Sinapaldehyde                 | 44 $\pm$ 4 <sup>a</sup>       | 44.7 $\pm$ 2.9 <sup>a</sup>   | 53.2 $\pm$ 1.1 <sup>b</sup>   | 70.45 $\pm$ 0.26 <sup>c</sup> | 68 $\pm$ 4 <sup>c</sup>           |
| Syringaresinol                | 455.3 $\pm$ 0.8 <sup>a</sup>  | 462 $\pm$ 10 <sup>a</sup>     | 519.4 $\pm$ 1.2 <sup>c</sup>  | 523.1 $\pm$ 2.0 <sup>c</sup>  | 499 $\pm$ 10 <sup>b</sup>         |
| Balanophonin                  | 8.15 $\pm$ 0.01 <sup>a</sup>  | 8.7 $\pm$ 0.7 <sup>a</sup>    | 10.19 $\pm$ 0.03 <sup>b</sup> | 11.31 $\pm$ 0.13 <sup>c</sup> | 8.2 $\pm$ 0.3 <sup>a</sup>        |
| TYPC                          | 3287 $\pm$ 13 <sup>b</sup>    | 3326 $\pm$ 37 <sup>b</sup>    | 3496 $\pm$ 20 <sup>c</sup>    | 3520 $\pm$ 56 <sup>c</sup>    | 3204.490 $\pm$ 0.002 <sup>a</sup> |
| HMF                           | 227.0 $\pm$ 1.9 <sup>a</sup>  | 313 $\pm$ 5 <sup>b</sup>      | 555 $\pm$ 6 <sup>c</sup>      | 791 $\pm$ 16 <sup>d</sup>     | 726 $\pm$ 15 <sup>e</sup>         |
| Furfural                      | 288.1 $\pm$ 1.6 <sup>a</sup>  | 292 $\pm$ 3 <sup>a</sup>      | 313 $\pm$ 8 <sup>a</sup>      | 412 $\pm$ 5 <sup>b</sup>      | 472 $\pm$ 7 <sup>b</sup>          |

Results are expressed as mean  $\pm$  SD (n=3). Values represented with different lowercase letters are statistically significant differences ( $p < 0.05$ ). RM: raw material. ND: Not detected.
