# Supplementary material for: High-Yield Recovery of Antioxidant Compounds from Bambusa chungii Culms Using Pressurized Hot Water Extraction
Source: Antioxidants (Basel). 2022 Nov 12;11(11):2231. doi: 10.3390/antiox11112231 (PMC9686541; doi:10.3390/antiox11112231)
Supplement: Supplementary file 1 [file antioxidants-11-02231-s001.zip › Table S4. Contents of the target phenolic compounds, FF, and HMF in the extracts obtained from PHWE at different material-to-liquid ratio..pdf]

**Table S4.** Contents of the target phenolic compounds, FF, and HMF in the extracts obtained from PHWE at different material-to-liquid ratio.

| Compounds                     | Yield (µg/g RM)         |                         |                         |                         |                        |
|-------------------------------|-------------------------|-------------------------|-------------------------|-------------------------|------------------------|
|                               | 1:30 (g/mL)             | 1:20 (g/mL)             | 1:15 (g/mL)             | 1:10 (g/mL)             | 1:5 (g/mL)             |
| Quinic acid                   | 24.9±1.0 <sup>b</sup>   | 20.8±0.9 <sup>a</sup>   | 22.6±0.4 <sup>b</sup>   | 19.2±0.8 <sup>a</sup>   | 21.4±1.6 <sup>a</sup>  |
| Adenosine                     | 27.9±2.2 <sup>bc</sup>  | 25.61±0.15 <sup>b</sup> | 29.77±0.10 <sup>c</sup> | 24.45±0.25 <sup>b</sup> | 16.6±1.4 <sup>a</sup>  |
| Arbutin                       | ND                      | ND                      | ND                      | ND                      | ND                     |
| Tachioside                    | ND                      | ND                      | ND                      | ND                      | ND                     |
| Vanillic alcohol              | ND                      | ND                      | ND                      | 4.21±0.27 <sup>a</sup>  | 3.33±0.15 <sup>b</sup> |
| <i>p</i> -Hydroxybenzoic acid | 33.97±0.28 <sup>c</sup> | 27.8±1.4 <sup>b</sup>   | 24.6±1.3 <sup>b</sup>   | 22±4 <sup>ab</sup>      | 18.5±1.0 <sup>a</sup>  |
| Vanillic acid                 | 63.4±1.0 <sup>e</sup>   | 59.2±0.3 <sup>d</sup>   | 46.0±0.8 <sup>c</sup>   | 35.31±0.28 <sup>b</sup> | 32.6±0.8 <sup>a</sup>  |
| <i>p</i> -Hydroxybenzaldehyde | 346±4 <sup>d</sup>      | 304±5 <sup>c</sup>      | 263±4 <sup>b</sup>      | 236±20 <sup>a</sup>     | 215±10 <sup>a</sup>    |
| Caffeic acid                  | 9.7±0.4 <sup>c</sup>    | 10.91±0.10 <sup>d</sup> | 8.57±0.27 <sup>b</sup>  | 8.38±0.23 <sup>b</sup>  | 3.09±0.17 <sup>a</sup> |
| Syringic acid                 | 58.90±0.09 <sup>c</sup> | 53.8±1.8 <sup>b</sup>   | 55.0±0.4 <sup>b</sup>   | 37.3±1.0 <sup>a</sup>   | 39.3±1.9 <sup>a</sup>  |
| Vanillin                      | 120.5±1.9 <sup>e</sup>  | 105±3 <sup>d</sup>      | 80.5±2.1 <sup>c</sup>   | 53.94±0.12 <sup>b</sup> | 38.3±0.8 <sup>a</sup>  |
| <i>p</i> -Coumaric acid       | 1139±11 <sup>d</sup>    | 1122±31 <sup>d</sup>    | 942±19 <sup>c</sup>     | 864±12 <sup>b</sup>     | 758±32 <sup>a</sup>    |
| Coniferol                     | 1430±33 <sup>d</sup>    | 966±7 <sup>c</sup>      | 978±22 <sup>c</sup>     | 716±11 <sup>b</sup>     | 584±12 <sup>a</sup>    |
| Syringaldehyde                | 98.8±2.5 <sup>e</sup>   | 90.5±0.5 <sup>d</sup>   | 72.4±0.3 <sup>c</sup>   | 53.2±1.0 <sup>b</sup>   | 32.2±1.6 <sup>a</sup>  |
| Ferulic acid                  | 40.7±0.3 <sup>c</sup>   | 44.2±0.5 <sup>c</sup>   | 35.6±1.2 <sup>b</sup>   | 24.89±0.05 <sup>a</sup> | 23.7±2.7 <sup>a</sup>  |
| Sinapic acid                  | ND                      | ND                      | ND                      | 3.83±0.07 <sup>b</sup>  | 2.8±0.4 <sup>a</sup>   |
| Coniferylaldehyde             | 78.2±0.8 <sup>d</sup>   | 72.6±0.4 <sup>d</sup>   | 55±5 <sup>c</sup>       | 38.9±0.9 <sup>b</sup>   | 29.0±1.5 <sup>a</sup>  |
| Sinapaldehyde                 | 61.36±0.13 <sup>d</sup> | 53.2±1.1 <sup>c</sup>   | 41±5 <sup>b</sup>       | 29.3±2.2 <sup>a</sup>   | 24.9±1.9 <sup>a</sup>  |
| Syringaresinol                | 581±13 <sup>e</sup>     | 519.4±1.2 <sup>d</sup>  | 346±7 <sup>c</sup>      | 227.6±0.4 <sup>b</sup>  | 201±6 <sup>a</sup>     |
| Balanophonin                  | 11.6±0.6 <sup>e</sup>   | 10.19±0.03 <sup>d</sup> | 7.8±0.6 <sup>c</sup>    | 5.7±0.3 <sup>b</sup>    | 3.3±0.3 <sup>a</sup>   |
| TYPC                          | 4119±40 <sup>e</sup>    | 3486±34 <sup>d</sup>    | 3009±54 <sup>c</sup>    | 2409±31 <sup>b</sup>    | 2050±56 <sup>a</sup>   |
| HMF                           | 532±3 <sup>b</sup>      | 555±6 <sup>b</sup>      | 536±13 <sup>b</sup>     | 379±16 <sup>a</sup>     | 399±32 <sup>a</sup>    |
| Furfural                      | 168±14 <sup>a</sup>     | 313±8 <sup>c</sup>      | 341±4 <sup>d</sup>      | 232±8 <sup>b</sup>      | 245±15 <sup>b</sup>    |

Results are expressed as mean ± SD (n=3). Values represented with different lowercase letters are statistically significant differences ( $p < 0.05$ ). ND: Not detected.
