# Supplementary material for: High-Yield Recovery of Antioxidant Compounds from Bambusa chungii Culms Using Pressurized Hot Water Extraction
Source: Antioxidants (Basel). 2022 Nov 12;11(11):2231. doi: 10.3390/antiox11112231 (PMC9686541; doi:10.3390/antiox11112231)
Supplement: Supplementary file 1 [file antioxidants-11-02231-s001.zip › Table S5. Model summary and ANOVA results of the response variables.pdf]

**Table S5.** Model summary and ANOVA results of the response variables

| Source                                                                                                                                                                                                                   | Sum of Squares |                |                |                        | Mean Square    |                |                |                        | F-value        |                |                |                | P-value        |                |                |                |
|--------------------------------------------------------------------------------------------------------------------------------------------------------------------------------------------------------------------------|----------------|----------------|----------------|------------------------|----------------|----------------|----------------|------------------------|----------------|----------------|----------------|----------------|----------------|----------------|----------------|----------------|
|                                                                                                                                                                                                                          | Y <sub>1</sub> | Y <sub>2</sub> | Y <sub>3</sub> | Y <sub>4</sub>         | Y <sub>1</sub> | Y <sub>2</sub> | Y <sub>3</sub> | Y <sub>4</sub>         | Y <sub>1</sub> | Y <sub>2</sub> | Y <sub>3</sub> | Y <sub>4</sub> | Y <sub>1</sub> | Y <sub>2</sub> | Y <sub>3</sub> | Y <sub>4</sub> |
| Model                                                                                                                                                                                                                    | 9.13           | 25.03          | 1540.50        | 0.31                   | 1.01           | 2.78           | 171.17         | 0.04                   | 116.49         | 5.14           | 31.41          | 18.97          | < 0.0001       | 0.0211         | < 0.0001       | 0.0004         |
| A                                                                                                                                                                                                                        | 1.43           | 4.22           | 223.00         | 0.02                   | 1.43           | 4.22           | 223.00         | 0.02                   | 163.97         | 7.81           | 40.92          | 12.84          | < 0.0001       | 0.0268         | 0.0004         | 0.0089         |
| B                                                                                                                                                                                                                        | 0.6707         | 0.6608         | 2.12           | 9.20 x10 <sup>-3</sup> | 0.6707         | 0.6608         | 2.12           | 9.20 x10 <sup>-3</sup> | 77.00          | 1.22           | 0.3897         | 4.96           | < 0.0001       | 0.3056         | 0.5523         | 0.0611         |
| C                                                                                                                                                                                                                        | 1.72           | 9.79           | 848.79         | 0.11                   | 1.72           | 9.79           | 848.79         | 0.11                   | 197.81         | 18.09          | 155.76         | 59.17          | < 0.0001       | 0.0038         | < 0.0001       | 0.0001         |
| AB                                                                                                                                                                                                                       | 0.0515         | 0.2993         | 16.74          | 6.00 x10 <sup>-4</sup> | 0.0515         | 0.2993         | 16.74          | 6.00 x10 <sup>-4</sup> | 5.91           | 0.5532         | 3.07           | 0.32           | 0.0453         | 0.4812         | 0.1231         | 0.5867         |
| AC                                                                                                                                                                                                                       | 0.0808         | 1.96           | 96.68          | 2.80 x10 <sup>-3</sup> | 0.0808         | 1.96           | 96.68          | 2.80 x10 <sup>-3</sup> | 9.27           | 3.63           | 17.74          | 1.52           | 0.0187         | 0.0985         | 0.0040         | 0.2576         |
| BC                                                                                                                                                                                                                       | 0.4613         | 0.3859         | 20.69          | 0.01                   | 0.4613         | 0.3859         | 20.69          | 0.01                   | 52.97          | 0.7133         | 3.80           | 6.18           | 0.0002         | 0.4263         | 0.0924         | 0.0418         |
| A <sup>2</sup>                                                                                                                                                                                                           | 0.0155         | 1.21           | 0.0726         | 4.10 x10 <sup>-3</sup> | 0.0155         | 1.21           | 0.0726         | 4.10 x10 <sup>-3</sup> | 1.77           | 2.24           | 0.0133         | 2.21           | 0.2245         | 0.1785         | 0.9114         | 0.1804         |
| B <sup>2</sup>                                                                                                                                                                                                           | 0.1210         | 2.59           | 1.03           | 4.20 x10 <sup>-3</sup> | 0.1210         | 2.59           | 1.03           | 4.20 x10 <sup>-3</sup> | 13.89          | 4.78           | 0.1895         | 2.30           | 0.0074         | 0.0650         | 0.6764         | 0.1735         |
| C <sup>2</sup>                                                                                                                                                                                                           | 4.20           | 4.68           | 298.84         | 0.13                   | 4.20           | 4.68           | 298.84         | 0.13                   | 482.53         | 8.65           | 54.84          | 68.28          | < 0.0001       | 0.0217         | 0.0001         | < 0.0001       |
| Residual                                                                                                                                                                                                                 | 0.0610         | 3.79           | 38.15          | 0.01                   | 0.0087         | 0.5410         | 5.45           | 1.80 x10 <sup>-3</sup> |                |                |                |                |                |                |                |                |
| Lack of fit                                                                                                                                                                                                              | 0.0385         | 2.67           | 6.00           | 6.90 x10 <sup>-3</sup> | 0.0128         | 0.8889         | 2.00           | 2.30 x10 <sup>-3</sup> | 2.28           | 3.17           | 0.2490         | 1.52           | 0.2210         | 0.1470         | 0.8587         | 0.3383         |
| Pure error                                                                                                                                                                                                               | 0.0225         | 1.12           | 32.14          | 6.00 x10 <sup>-3</sup> | 0.0056         | 0.2802         | 8.04           | 1.50 x10 <sup>-3</sup> |                |                |                |                |                |                |                |                |
| Total                                                                                                                                                                                                                    | 9.19           | 28.82          | 1578.64        | 0.33                   |                |                |                |                        |                |                |                |                |                |                |                |                |
| Y <sub>1</sub> : R <sup>2</sup> =0.9941, R <sup>2</sup> <sub>Adj</sub> =0.9864, Ratio=41.2781, C.V.%=3.16%; Y <sub>2</sub> : R <sup>2</sup> =0.8686, R <sup>2</sup> <sub>Adj</sub> =0.6996, Ratio=7.9085, C.V.%=9.19%    |                |                |                |                        |                |                |                |                        |                |                |                |                |                |                |                |                |
| Y <sub>3</sub> : R <sup>2</sup> =0.9758, R <sup>2</sup> <sub>Adj</sub> =0.9448, Ratio =18.8828, C.V.%=6.91%; Y <sub>4</sub> : R <sup>2</sup> =0.9606, R <sup>2</sup> <sub>Adj</sub> =0.9100, Ratio =15.8843, C.V.%=4.74% |                |                |                |                        |                |                |                |                        |                |                |                |                |                |                |                |                |

ANOVA: Analysis of variance; R<sup>2</sup>: coefficient of determination; R<sup>2</sup><sub>Adj</sub>: the adjusted R<sup>2</sup>; Ratio: signal to noise ratio; C.V.: coefficients of variation.
